# Supplementary material for: Novel, non-symbiotic isolates of Neorhizobium from a dryland agricultural soil
Source: PeerJ. 2018 May 16;6:e4776. doi: 10.7717/peerj.4776 (PMC5960266; doi:10.7717/peerj.4776)
Supplement: Table S1 [file peerj-06-4776-s003.docx]

Physicochemical properties of Tomejil soil

| Property |  | Tomejil soil |
| --- | --- | --- |
| (pH) (Ext.1:2.5)1 |  | 8.1 |
| Pretest salinity1 (µS/cm) (Ext.1:5) |  | 239 |
|
| Organic matter (%)1 |  | 2.48 |
| Total nitrogen (%)1 |  | 0.192 |
| Carbonates  (% CaCO3)2 |  | 34.5 |
| Exchangeable cation (ppm)1 | Na | 80 |
| K | 2,279 |
| Ca | 7,138 |
| Mg | 247 |
| P (Olsen) | 40.7 |
|  |  |  |
| Texture  (Bouyoucos method)1 | Clay | 17.2 |
| Silt | 38.2 |
| Sand | 44.6 |
